# Supplementary material for: The Impact of COVID-19 on Food Consumption and Dietary Quality of Rural Households in China
Source: MDPI journal article supplement (doi:10.3390/foods11040510), 2022-02-10
Supplement: s1 [file s1]

## Supplementary file:

**Table S1 Short-run impact of COVID-19 on the consumption of 8 food categories**

| Variable             | grains  | vegetables | fruits | meat   | eggs    | aquaculture | dairy products | legumes |
|----------------------|---------|------------|--------|--------|---------|-------------|----------------|---------|
| COVID-19             | 7.71    | 119.61*    | 18.85  | 12.76  | 9.49    | 29.85*      | -9.52          | 29.36*  |
| ln(income)           | -2.06   | 11.48      | 5.65   | 12.25  | 2.02    | -3.21       | 3.84           | 1.76    |
| household size       | -17.69* | -28.76*    | -5.81  | -6.32  | -6.98*  | -1.37       | -7.72          | -5.19   |
| old_share            | -51.23  | 15.67      | -18.82 | -28.16 | -31.33* | -22.50      | -19.85         | 35.19   |
| children_share       | -118.60 | -31.29     | -41.03 | -10.49 | -36.23  | -124.66*    | 76.88          | -26.06  |
| production diversity | 5.88    | 5.18       | -2.09  | -0.48  | 3.69    | -1.06       | 0.68           | -1.74   |
| Age                  | 0.35    | -1.30      | 1.08*  | 1.03   | 0.13    | -0.31       | 1.37*          | -0.59   |
| Gender(male)         | 34.21   | -65.32     | -42.58 | 1.10   | 10.56   | -5.17       | -45.97         | 24.66   |
| Marital status       | -30.77  | 53.63      | -9.51  | -13.63 | -11.87  | 7.82        | 14.55          | -55.27* |
| Education            | -7.83*  | -8.07*     | 2.70   | 0.33   | -0.18   | 0.68        | 3.37*          | -0.21   |
| Village control      | Yes     | Yes        | Yes    | Yes    | Yes     | Yes         | Yes            | Yes     |
| Constant             | 499.69* | 573.82*    | 48.75  | 48.61  | 121.04* | 98.87       | -10.88         | 91.20*  |
| Observations         | 418     | 418        | 418    | 418    | 418     | 418         | 418            | 418     |
| Number of hhid       | 315     | 315        | 315    | 315    | 315     | 315         | 315            | 315     |
| Mean of Y            | 319.90  | 296.40     | 66.37  | 84.91  | 53.76   | 62.02       | 61.51          | 60.85   |

Note: Results were estimated using Random-Effect model and using data collected in 2019 and 2020. Characteristics of household (income, household size, share of children and old people in the household, diversity of agricultural production) and household head (age, gender, marital status, education), and village dummies had been adjusted in the regression. Number of hhid is the number of households net of duplicated observations. \* refers to statistically significant at 5%.

**Table S2 Long-run impact of COVID-19 on the consumption of 8 food categories**

| Variable             | grains  | vegetables | fruits | meat    | eggs    | aquaculture | dairy products | legumes |
|----------------------|---------|------------|--------|---------|---------|-------------|----------------|---------|
| COVID-19             | 3.60    | 92.92*     | 37.24* | 27.88*  | 10.55   | 29.47*      | -6.33          | 24.48*  |
| ln(income)           | 8.63    | 11.57      | 23.97* | 19.19*  | 15.15*  | -0.19       | 8.89           | 7.43    |
| household size       | -22.43* | -27.59*    | -3.50  | -12.77* | -4.84   | -0.67       | -7.85          | -3.63   |
| old_share            | -0.66   | 15.39      | 22.00  | -17.60  | -27.17  | -7.72       | -1.55          | 23.47   |
| children_share       | 53.55   | -49.54     | -2.43  | 61.38   | -64.33  | -107.51*    | 78.20          | -46.71  |
| production diversity | 2.22    | 0.22       | -1.00  | 1.77    | 1.62    | -0.93       | 4.16           | -2.95   |
| Age                  | -0.01   | -0.42      | 0.41   | 0.45    | 0.11    | 0.01        | 0.15           | -0.33   |
| Gender(male)         | 23.58   | -20.20     | -35.87 | -12.60  | -0.56   | 13.38       | -7.05          | 54.23*  |
| Marital status       | -1.30   | 16.33      | -39.90 | 10.61   | -4.09   | -22.46      | -14.43         | -99.85* |
| Education            | -7.67*  | -6.69*     | 5.13*  | 1.37    | -0.29   | 3.20        | 3.31*          | 1.81    |
| Village control      | Yes     | Yes        | Yes    | Yes     | Yes     | Yes         | Yes            | Yes     |
| Constant             | 487.05* | 493.54*    | 45.31  | 50.22   | 101.49* | 30.18       | 25.92          | 79.70   |
| Observations         | 626     | 626        | 626    | 626     | 626     | 626         | 626            | 626     |
| Number of hhid       | 345     | 345        | 345    | 345     | 345     | 345         | 345            | 345     |
| Mean of Y            | 323.2   | 307.6      | 81.50  | 98.01   | 57.82   | 66.40       | 61.53          | 63.76   |

Note: Results were estimated using Radom-Effect model and using data collected from 2019 to 2021. Characteristics of household (income, household size, share of children and old people in the household, diversity of agricultural production) and household head (age, gender, marital status, education), and village dummies had been adjusted in the regression. Number of hhid is the number of households net of duplicated observations. \* refers to statistically significant at 5%.

**Table S3 Short-run impact of COVID-19 on the consumption of 8 food categories for farmers**

| Variable             | grains  | vegetables | fruits | meat    | eggs    | aquaculture | dairy products | legumes |
|----------------------|---------|------------|--------|---------|---------|-------------|----------------|---------|
| COVID-19             | 6.99    | 137.28*    | 23.41  | 28.23   | 8.07    | 28.08*      | -7.88          | 25.35*  |
| ln(income)           | 4.81    | 14.50      | 4.66   | 12.72   | 4.97    | 0.39        | 0.21           | 4.58    |
| household size       | -20.39* | -30.37*    | -5.47  | -10.58* | -10.08* | 2.04        | -8.66          | -5.42   |
| old_share            | -75.91  | -20.34     | -25.71 | -13.58  | -44.18  | 6.76        | 8.32           | 57.53*  |
| children_share       | -178.77 | -62.69     | -50.33 | -4.84   | -42.06  | -103.41     | 108.75         | 16.80   |
| production diversity | 9.51    | 3.43       | -3.93  | -3.99   | 4.18    | 1.34        | 0.40           | 0.40    |
| Age                  | 0.67    | -0.78      | 0.76   | 0.15    | -0.17   | -0.90       | 1.12           | -1.15*  |
| Gender(male)         | 33.14   | -68.66     | 2.77   | 33.89   | 15.75   | -1.98       | -41.12         | 61.87*  |
| Marital status       | -46.05  | 61.65      | 5.33   | -46.18  | -13.92  | -19.94      | 33.38          | -69.27* |
| Education            | -8.75*  | -10.25*    | 1.93   | -0.60   | -0.38   | 0.46        | 2.56           | -0.90   |
| Village control      | Yes     | Yes        | Yes    | Yes     | Yes     | Yes         | Yes            | Yes     |
| Constant             | 537.39* | 631.97*    | 55.09  | 157.61* | 184.02* | 108.71      | -10.63         | 108.39* |
| Observations         | 289     | 289        | 289    | 289     | 289     | 289         | 289            | 289     |
| Number of hhid       | 193     | 193        | 193    | 193     | 193     | 193         | 193            | 193     |
| Mean of Y            | 319.90  | 296.40     | 66.37  | 84.91   | 53.76   | 62.02       | 61.51          | 60.85   |

Note: Results were estimated using Radom-Effect model and using data collected in 2019 and 2020. Characteristics of household (income, household size, share of children and old people in the household, diversity of agricultural production) and household head (age, gender, marital status, education), and village dummies had been adjusted in the regression. Farmers referred to rural households who were still engaged in agricultural production. Number of hhid is the number of households net of duplicated observations. \* refers to statistically significant at 5%.

**Table S4 Long-run impact of COVID-19 on the consumption of 8 food categories for farmers**

| Variable             | grains  | vegetables | fruits | meat   | eggs    | aquaculture | dairy products | legumes  |
|----------------------|---------|------------|--------|--------|---------|-------------|----------------|----------|
| COVID-19             | -1.83   | 100.59*    | 36.90* | 27.39* | 7.87    | 26.46*      | -9.21          | 18.94*   |
| ln(income)           | 14.01   | 13.83      | 26.30* | 15.92* | 17.99*  | 2.58        | 9.46           | 10.97*   |
| household size       | -26.08* | -27.05*    | 1.74   | -9.38* | -5.75   | 3.23        | -8.58          | -2.09    |
| old_share            | -4.87   | 4.30       | 34.62  | 15.90  | -23.21  | 28.84       | 22.87          | 48.48*   |
| children_share       | 59.62   | -57.02     | -47.45 | 40.55  | -88.49  | -82.19      | 97.45          | -18.18   |
| production diversity | 5.11    | 3.03       | -4.63  | -0.09  | 1.10    | -0.29       | 6.82*          | -3.64    |
| Age                  | 0.26    | -0.42      | -0.25  | -0.55  | -0.03   | -0.75       | -0.32          | -0.97    |
| Gender(male)         | 23.16   | -22.34     | -7.07  | 5.51   | -5.01   | 25.85       | 1.58           | 75.50*   |
| Marital status       | 0.86    | -0.41      | -35.49 | -11.35 | -4.01   | -57.02*     | -23.89         | -125.29* |
| Education            | -9.82*  | -7.53*     | 5.31*  | -0.03  | -0.23   | 3.43        | 3.35*          | 1.78     |
| Village control      | Yes     | Yes        | Yes    | Yes    | Yes     | Yes         | Yes            | Yes      |
| Constant             | 508.05* | 537.54*    | 61.98  | 129.49 | 132.11* | 43.61       | 36.30          | 117.37*  |
| Observations         | 469     | 469        | 469    | 469    | 469     | 469         | 469            | 469      |
| Number of hhid       | 286     | 286        | 286    | 286    | 286     | 286         | 286            | 286      |
| Mean of Y            | 323.20  | 307.60     | 81.50  | 98.01  | 57.82   | 66.40       | 61.53          | 63.76    |

Note: Results were estimated using Radom-Effect model and using data collected from 2019 to 2021. Characteristics of household (income, household size, share of children and old people in the household, diversity of agricultural production) and household head (age, gender, marital status, education), and village dummies had been adjusted in the regression. Farmers referred to rural households who were still engaged in agricultural production. Number of hhid is the number of households net of duplicated observations. \* refers to statistically significant at 5%.

**Table S5 Short-run impact of COVID-19 on the consumption of 8 food categories for non-farmers**

| Variable        | grains  | vegetables | fruits  | meat     | eggs   | aquaculture | dairy products | legumes |
|-----------------|---------|------------|---------|----------|--------|-------------|----------------|---------|
| COVID-19        | -14.11  | -17.01     | 5.26    | -106.42* | 15.75  | 53.38*      | -30.61         | 58.90*  |
| ln(income)      | -21.25  | -19.92     | -1.61   | 1.67     | -3.52  | -7.95       | 13.60          | -1.67   |
| household size  | -11.28  | -29.34*    | -13.28  | 1.00     | -3.86  | -11.41      | -6.79          | -9.41   |
| old_share       | 9.65    | 46.87      | -29.04  | -39.40   | -14.47 | -95.16      | -67.96         | 19.01   |
| children_share  | 62.87   | 195.11     | 38.28   | 87.01    | -0.47  | -114.85     | 73.92          | -11.50  |
| Age             | -0.41   | -1.87      | 0.88    | 2.88     | 0.18   | 0.92        | 2.05           | -0.28   |
| Gender(male)    | 43.30   | -99.12     | -228.29 | -49.43   | 8.18   | -34.73      | -44.56         | -80.75  |
| Marital status  | -8.03   | 27.75      | -61.70  | 8.55     | -14.38 | 57.42       | -27.53         | -35.58  |
| Education       | -0.45   | -4.94      | 3.39    | 4.65     | -0.41  | -0.97       | 2.47           | 0.91    |
| Village control | Yes     | Yes        | Yes     | Yes      | Yes    | Yes         | Yes            | Yes     |
| Constant        | 374.21* | 553.83*    | 218.73  | -105.02  | 47.47  | 80.60       | -16.25         | 89.66   |
| Observations    | 129     | 129        | 129     | 129      | 129    | 129         | 129            | 129     |
| Number of hhid  | 122     | 122        | 122     | 122      | 122    | 122         | 122            | 122     |
| Mean of Y       | 319.90  | 296.40     | 66.37   | 84.91    | 53.76  | 62.02       | 61.51          | 60.85   |

Note: Results were estimated using Radom-Effect model and using data collected in 2019 and 2020. Characteristics of household (income, household size, share of children and old people in the household, diversity of agricultural production) and household head (age, gender, marital status, education), and village dummies had been adjusted in the regression. Non-farmers referred to rural households who did not produce any foods. Number of hhid is the number of households net of duplicated observations. \* refers to statistically significant at 5%.

**Table S6 Long-run impact of COVID-19 on the consumption of 8 food categories for non-farmers**

| Variable        | grains  | vegetables | fruits   | meat     | eggs   | aquaculture | dairy products | legumes |
|-----------------|---------|------------|----------|----------|--------|-------------|----------------|---------|
| COVID-19        | 8.03    | -24.61     | 6.54     | -63.98   | 44.39  | 73.88*      | -30.59         | 56.02*  |
| ln(income)      | -8.54   | -10.37     | 11.52    | 33.40    | 1.14   | -4.87       | 16.18          | 2.13    |
| household size  | -13.29  | -34.34*    | -16.90   | -25.22   | -3.97  | -25.25*     | -8.02          | -12.54  |
| old_share       | 57.00   | 39.04      | -24.85   | -132.81* | -40.97 | -137.49*    | -39.01         | -34.43  |
| children_share  | 165.83  | 87.68      | 115.96   | 260.98   | -90.61 | -65.55      | 117.63         | -57.07  |
| Age             | -1.16   | -0.80      | 1.59     | 6.29*    | 0.15   | 2.55        | 1.25           | 1.59    |
| Gender(male)    | 17.98   | -29.87     | -224.11* | -96.73*  | -13.20 | -41.59      | -30.03         | -20.58  |
| Marital status  | -22.41  | 64.24      | -25.38   | 88.14    | 4.97   | 88.57*      | 0.83           | -32.75  |
| Education       | 1.40    | -4.45      | 5.31     | 4.98     | 1.19   | -1.99       | 1.19           | 0.35    |
| Village control | Yes     | Yes        | Yes      | Yes      | Yes    | Yes         | Yes            | Yes     |
| Constant        | 386.06* | 443.24*    | 120.45   | -301.75* | 61.01  | 0.61        | -5.29          | -40.13  |
| Observations    | 157     | 157        | 157      | 157      | 157    | 157         | 157            | 157     |
| Number of hhid  | 142     | 142        | 142      | 142      | 142    | 142         | 142            | 142     |
| Mean of Y       | 323.20  | 307.60     | 81.50    | 98.01    | 57.82  | 66.40       | 61.53          | 63.76   |

Note: Results were estimated using Radom-Effect model and using data collected from 2019 to 2021. Characteristics of household (income, household size, share of children and old people in the household, diversity of agricultural production) and household head (age, gender, marital status, education), and village dummies had been adjusted in the regression. Non-farmers referred to rural households who did not produce any foods. Number of hhid is the number of households net of duplicated observations. \* refers to statistically significant at 5%.

**Table S7 Impact of COVID-19 on dietary diversity and CFPS**

| Variable             | Short-run         |       | Long-run          |       |
|----------------------|-------------------|-------|-------------------|-------|
|                      | dietary diversity | CFPS  | dietary diversity | CFPS  |
| COVID-19             | -0.64*            | 0.24* | -0.75*            | 0.17  |
| ln(income)           | 0.14              | 0.06  | 0.17*             | 0.06  |
| household size       | -0.09             | -0.08 | -0.03             | -0.03 |
| old_share            | -0.34             | -0.18 | -0.32             | -0.04 |
| children_share       | -0.02             | -0.04 | -0.53             | -0.47 |
| production diversity | -0.02             | -0.01 | 0.03              | 0.00  |
| Age                  | 0.01              | 0.01  | 0.01              | 0.01  |
| Gender(male)         | -0.33             | -0.24 | -0.07             | -0.14 |
| Marital status       | -0.18             | 0.41  | -0.14             | 0.19  |
| Education            | 0.05              | 0.01  | 0.06*             | 0.02  |
| Village control      | Yes               | Yes   | Yes               | Yes   |
| Constant             | 4.73*             | 1.16* | 4.39*             | 1.23* |
| Observations         | 418               | 418   | 626               | 626   |
| Number of hhid       | 325               | 325   | 345               | 345   |
| Mean of Y            | 5.42              | 2.25  | 5.23              | 2.23  |

Note: Results were estimated using Radom-Effect model. Short-run impact was estimated using data collected in 2019 and 2020, and long-run impact was tested using data collected from 2019 to 2021. Dietary diversity was the number of food items consumed by each household. CFPS was the Chinese Food Pagoda Score. Characteristics of household (income, household size, share of children and old people in the household, diversity of agricultural production) and household head (age, gender, marital status, education), and village dummies had been adjusted in the regression. Number of hhid is the number of households net of duplicated observations. \* refers to statistically significant at 5%.

**Table S8 Impact of COVID-19 on dietary diversity and CFPS for farmers and non-farmers**

| Variable             | Short-run         |        |                   |       | Long-run          |       |                   |        |
|----------------------|-------------------|--------|-------------------|-------|-------------------|-------|-------------------|--------|
|                      | Farmers           |        | Non-farmers       |       | Farmers           |       | Non-farmers       |        |
|                      | dietary diversity | CFPS   | dietary diversity | CFPS  | dietary diversity | CFPS  | dietary diversity | CFPS   |
| COVID-19             | -0.60*            | 0.30*  | -0.58             | 0.38  | -0.78*            | 0.17  | -0.66             | 0.29   |
| ln(income)           | 0.01              | -0.03  | 0.30              | 0.14  | 0.19*             | 0.05  | 0.19              | 0.04   |
| household size       | -0.13             | -0.10* | -0.01             | -0.09 | -0.05             | -0.03 | -0.02             | -0.11  |
| old_share            | -0.29             | -0.34  | -0.43             | -0.49 | -0.05             | 0.07  | -1.09*            | -0.70* |
| children_share       | 0.12              | -0.34  | 0.03              | 0.76  | -0.38             | -0.62 | -0.03             | 0.73   |
| production diversity | -0.06             | -0.09* | ---               | ---   | 0.06              | -0.00 | ---               | ---    |
| Age                  | 0.02              | 0.02*  | 0.01              | 0.02  | 0.01              | 0.01  | 0.03              | 0.02   |
| Gender(male)         | -0.06             | -0.21  | -1.35*            | -0.43 | 0.08              | -0.07 | -1.03             | -0.46  |
| Marital status       | -0.22             | 0.44   | -0.15             | 0.29  | -0.21             | 0.06  | -0.04             | 0.50   |
| Education            | 0.03              | -0.00  | 0.11              | 0.03  | 0.05              | 0.02  | 0.07              | -0.00  |
| Village control      | Yes               | Yes    | Yes               | Yes   | Yes               | Yes   | Yes               | Yes    |
| Constant             | 5.07*             | 1.42*  | 4.72*             | 0.80  | 4.44*             | 1.44* | 4.07*             | 1.10   |
| Observations         | 289               | 289    | 129               | 129   | 469               | 469   | 157               | 157    |
| Number of hhid       | 193               | 193    | 122               | 122   | 286               | 286   | 142               | 142    |
| Mean of Y            | 5.42              | 2.25   | 5.42              | 2.25  | 5.23              | 2.23  | 5.23              | 2.23   |

Note: Results were estimated using Radom-Effect model. Short-run impact was estimated using data collected in 2019 and 2020, and long-run impact was tested using data collected from 2019 to 2021. Dietary diversity was the number of food items consumed by each household. CFPS was the Chinese Food Pagoda Score. Characteristics of household (income, household size, share of children and old people in the household, diversity of agricultural production) and household head (age, gender, marital status, education), and village dummies had been adjusted in the regression. Farmers referred to rural households who were still engaged in agricultural production, and non-farmers was the sample only includes rural households who did not produce any foods. Number of hhid is the number of households net of duplicated observations. \* refers to statistically significant at 5%.



**Table S9 Short-run impact of COVID-19 on the consumption of 8 food categories**

| Variable             | grains  | vegetables | fruits | meat   | eggs    | aquaculture | dairy products | legumes |
|----------------------|---------|------------|--------|--------|---------|-------------|----------------|---------|
| COVID-19             | 11.70   | 119.61*    | 19.70  | 12.75  | 10.65   | 29.66*      | -8.67          | 28.04*  |
| ln(income)           | -1.01   | 11.48      | 5.78   | 12.26  | 0.81    | -2.22       | 3.74           | 1.93    |
| household size       | -16.59* | -28.76*    | -6.14  | -6.34  | -6.46*  | -0.33       | -8.33          | -5.18   |
| old_share            | -51.73  | 15.67      | -19.78 | -28.24 | -29.59* | -17.27      | -19.80         | 36.37   |
| children_share       | -118.35 | -31.29     | -35.83 | -10.36 | -34.48  | -127.63*    | 79.01          | -16.83  |
| production diversity | 7.00    | 5.18       | -1.67  | -0.49  | 3.99    | -1.11       | 1.06           | -1.87   |
| Age                  | 0.41    | -1.30      | 1.12*  | 1.03   | 0.09    | -0.33       | 1.38*          | -0.58   |
| Gender(male)         | 31.30   | -65.32     | -39.03 | 1.08   | 10.96   | -8.55       | -44.47         | 27.13   |
| Marital status       | -34.10  | 53.63      | -9.76  | -13.54 | -17.71  | 8.52        | 17.17          | -55.36* |
| Education            | -7.86*  | -8.07*     | 2.82   | 0.33   | -0.35   | 0.82        | 3.37*          | -0.31   |
| Village control      | Yes     | Yes        | Yes    | Yes    | Yes     | Yes         | Yes            | Yes     |
| Constant             | 493.61* | 573.82*    | 44.32  | 48.43  | 119.45* | 94.33       | -14.00         | 88.54*  |
| Observations         | 418     | 418        | 418    | 418    | 418     | 418         | 418            | 418     |
| R <sup>2</sup>       | 0.15    | 0.30       | 0.07   | 0.09   | 0.09    | 0.14        | 0.09           | 0.16    |
| Mean of Y            | 319.90  | 296.40     | 66.37  | 84.91  | 53.76   | 62.02       | 61.51          | 60.85   |

Note: Results were estimated using OLS model and using data collected in 2019 and 2020. Characteristics of household (income, household size, share of children and old people in the household, diversity of agricultural production) and household head (age, gender, marital status, education), and village dummies had been adjusted in the regression. \* refers to statistically significant at 5%.

**Table S10 Long-run impact of COVID-19 on the consumption of 8 food categories**

| Variable             | grains  | vegetables | fruits | meat    | eggs    | aquaculture | dairy products | legumes  |
|----------------------|---------|------------|--------|---------|---------|-------------|----------------|----------|
| COVID-19             | 4.65    | 92.90*     | 37.98* | 27.79*  | 14.07*  | 29.15*      | -5.99          | 23.33*   |
| ln(income)           | 8.74    | 11.35      | 23.72* | 19.22*  | 11.86*  | 0.08        | 8.97           | 7.50     |
| household size       | -21.27* | -27.43*    | -4.25  | -12.77* | -5.09   | -0.39       | -7.96*         | -3.46    |
| old_share            | 0.68    | 17.22      | 15.12  | -17.44  | -25.19  | -6.34       | -1.66          | 26.99    |
| children_share       | 51.04   | -48.56     | -10.02 | 61.95   | -59.34  | -108.16*    | 78.38          | -41.34   |
| production diversity | 2.60    | 0.27       | -0.93  | 1.71    | 1.88    | -0.98       | 4.21           | -2.86    |
| Age                  | 0.01    | -0.44      | 0.53   | 0.45    | 0.05    | 0.06        | 0.15           | -0.37    |
| Gender(male)         | 23.60   | -20.01     | -35.49 | -12.73  | -1.72   | 13.41       | -7.12          | 55.68*   |
| Marital status       | -4.32   | 15.66      | -40.44 | 10.76   | -6.93   | -22.14      | -14.30         | -100.15* |
| Education            | -7.78*  | -6.72*     | 5.25*  | 1.38    | -0.44   | 3.27*       | 3.33*          | 1.81     |
| Village control      | Yes     | Yes        | Yes    | Yes     | Yes     | Yes         | Yes            | Yes      |
| Constant             | 482.85* | 495.35*    | 45.73  | 49.80   | 106.11* | 23.27       | 26.07          | 78.61    |
| Observations         | 626     | 626        | 626    | 626     | 626     | 626         | 626            | 626      |
| R <sup>2</sup>       | 0.11    | 0.22       | 0.10   | 0.07    | 0.07    | 0.11        | 0.09           | 0.12     |
| Mean of Y            | 323.20  | 307.6      | 81.50  | 98.01   | 57.82   | 66.40       | 61.53          | 63.76    |

Note: Results were estimated using OLS model and using data collected from 2019 to 2021. Characteristics of household (income, household size, share of children and old people in the household, diversity of agricultural production) and household head (age, gender, marital status, education), and village dummies had been adjusted in the regression. \* refers to statistically significant at 5%.

**Table S11 Short-run impact of COVID-19 on the consumption of 8 food categories for farmers**

| Variable             | grains  | vegetables | fruits | meat    | eggs    | aquaculture | dairy products | legumes |
|----------------------|---------|------------|--------|---------|---------|-------------|----------------|---------|
| COVID-19             | 9.45    | 137.28*    | 23.52* | 28.23   | 8.15    | 28.08*      | -7.23          | 25.35*  |
| ln(income)           | 4.99    | 14.50      | 4.67   | 12.72   | 2.23    | 0.39        | 0.37           | 4.58    |
| household size       | -19.28* | -30.37*    | -5.49  | -10.58* | -8.56*  | 2.04        | -8.91          | -5.42   |
| old_share            | -75.79  | -20.34     | -25.91 | -13.58  | -38.80  | 6.76        | 7.24           | 57.53*  |
| children_share       | -170.12 | -62.69     | -49.92 | -4.84   | -41.43  | -103.41     | 108.05         | 16.80   |
| production diversity | 10.81   | 3.43       | -3.90  | -3.99   | 5.06    | 1.34        | 0.56           | 0.40    |
| Age                  | 0.71    | -0.78      | 0.77   | 0.15    | -0.15   | -0.90       | 1.12           | -1.15*  |
| Gender(male)         | 30.29   | -68.66     | 2.65   | 33.89   | 16.48   | -1.98       | -39.96         | 61.87*  |
| Marital status       | -48.52  | 61.65      | 5.13   | -46.18  | -20.70  | -19.94      | 33.02          | -69.27* |
| Education            | -8.61*  | -10.25*    | 1.95   | -0.60   | -0.64   | 0.46        | 2.56           | -0.90   |
| Village control      | Yes     | Yes        | Yes    | Yes     | Yes     | Yes         | Yes            | Yes     |
| Constant             | 529.93* | 631.97*    | 54.68  | 157.61* | 165.83* | 108.71      | -11.08         | 108.39* |
| Observations         | 289     | 289        | 289    | 289     | 289     | 289         | 289            | 289     |
| R <sup>2</sup>       | 0.19    | 0.36       | 0.13   | 0.17    | 0.12    | 0.12        | 0.10           | 0.21    |
| Mean of Y            | 319.90  | 296.40     | 66.37  | 84.91   | 53.76   | 62.02       | 61.51          | 60.85   |

Note: Results were estimated using OLS model and using data collected in 2019 and 2020. Characteristics of household (income, household size, share of children and old people in the household, diversity of agricultural production) and household head (age, gender, marital status, education), and village dummies had been adjusted in the regression. Farmers referred to rural households who were still engaged in agricultural production. \* refers to statistically significant at 5%.

**Table S12 Long-run impact of COVID-19 on the consumption of 8 food categories for farmers**

| Variable             | grains  | vegetables | fruits | meat   | eggs    | aquaculture | dairy products | legumes  |
|----------------------|---------|------------|--------|--------|---------|-------------|----------------|----------|
| COVID-19             | -1.24   | 100.59*    | 38.65* | 27.39* | 10.68   | 26.05*      | -9.21          | 18.94*   |
| ln(income)           | 12.49   | 13.83      | 26.91* | 15.92* | 15.98*  | 2.80        | 9.46           | 10.97*   |
| household size       | -24.98* | -27.05*    | 0.51   | -9.38  | -4.08   | 3.45        | -8.58*         | -2.09    |
| old_share            | -5.57   | 4.30       | 28.17  | 15.90  | -16.08  | 29.91       | 22.87          | 48.48*   |
| children_share       | 56.46   | -57.02     | -53.97 | 40.55  | -63.78  | -83.82      | 97.45          | -18.18   |
| production diversity | 6.12    | 3.03       | -3.90  | -0.09  | 1.01    | -0.36       | 6.82*          | -3.64    |
| Age                  | 0.32    | -0.42      | -0.15  | -0.55  | -0.17   | -0.73       | -0.32          | -0.97    |
| Gender(male)         | 23.48   | -22.34     | -6.71  | 5.51   | -1.86   | 25.64       | 1.58           | 75.50*   |
| Marital status       | -1.54   | -0.41      | -37.66 | -11.35 | -9.42   | -57.21*     | -23.89         | -125.29* |
| Education            | -9.68*  | -7.53*     | 5.21*  | -0.03  | -1.03   | 3.47*       | 3.35*          | 1.78     |
| Village control      | Yes     | Yes        | Yes    | Yes    | Yes     | Yes         | Yes            | Yes      |
| Constant             | 499.71* | 537.54*    | 61.59  | 129.49 | 125.71* | 40.96       | 36.30          | 117.37*  |
| Observations         | 469     | 469        | 469    | 469    | 469     | 469         | 469            | 469      |
| R <sup>2</sup>       | 0.13    | 0.23       | 0.13   | 0.08   | 0.08    | 0.11        | 0.10           | 0.15     |
| Mean of Y            | 323.2   | 307.6      | 81.50  | 98.01  | 57.82   | 66.40       | 61.53          | 63.76    |

Note: Results were estimated using OLS model and using data collected from 2019 to 2021. Characteristics of household (income, household size, share of children and old people in the household, diversity of agricultural production) and household head (age, gender, marital status, education), and village dummies had been adjusted in the regression. Farmers referred to rural households who were still engaged in agricultural production. \* refers to statistically significant at 5%.

**Table S13 Short-run impact of COVID-19 on the consumption of 8 food categories for non-farmers**

| Variable        | grains | vegetables | fruits  | meat   | eggs   | aquaculture | dairy products | legumes |
|-----------------|--------|------------|---------|--------|--------|-------------|----------------|---------|
| COVID-19        | -1.18  | -17.01     | 4.03    | -49.14 | 16.08  | 45.13*      | -12.39         | 51.01   |
| ln(income)      | -21.58 | -19.92     | -4.44   | 2.18   | -3.45  | -6.72       | 13.75          | -0.91   |
| household size  | -9.68  | -29.34*    | -13.55  | 3.25   | -3.97  | -10.54      | -8.85          | -8.77   |
| old_share       | 10.19  | 46.87      | -32.45  | -38.00 | -14.21 | -94.02      | -74.71         | 20.91   |
| children_share  | 53.70  | 195.11     | 37.16   | 36.50  | 1.61   | -120.46     | 72.60          | -10.83  |
| Age             | 0.02   | -1.87      | 1.03    | 2.42   | 0.20   | 1.34        | 2.07           | -0.15   |
| Gender(male)    | 50.62  | -99.12     | -228.62 | -54.28 | 8.88   | -27.66      | -51.94         | -74.31  |
| Marital status  | -12.33 | 27.75      | -57.16  | -2.87  | -15.50 | 59.52       | -19.14         | -41.63  |
| Education       | -0.25  | -4.94      | 3.39    | 5.18   | -0.42  | -0.82       | 2.53           | 0.90    |
| Village Control | Yes    | Yes        | Yes     | Yes    | Yes    | Yes         | Yes            | Yes     |
| Constant        | 329.52 | 553.83*    | 211.65  | -96.73 | 46.20  | 45.86       | -17.56         | 80.53   |
| Observations    | 129    | 129        | 129     | 129    | 129    | 129         | 129            | 129     |
| R <sup>2</sup>  | 0.25   | 0.36       | 0.27    | 0.22   | 0.16   | 0.34        | 0.19           | 0.23    |
| Mean of Y       | 319.90 | 296.40     | 66.37   | 84.91  | 53.76  | 62.02       | 61.51          | 60.85   |

Note: Results were estimated using OLS model and using data collected in 2019 and 2020. Characteristics of household (income, household size, share of children and old people in the household, diversity of agricultural production) and household head (age, gender, marital status, education), and village dummies had been adjusted in the regression. Non-farmers referred to rural households who did not produce any foods. \* refers to statistically significant at 5%.

**Table S14 Long-run impact of COVID-19 on the consumption of 8 food categories for non-farmers**

| Variable        | grains  | vegetables | fruits   | meat     | eggs   | aquaculture | dairy products | legumes |
|-----------------|---------|------------|----------|----------|--------|-------------|----------------|---------|
| COVID-19        | 12.75   | -2.20      | 18.07    | -13.42   | 44.39  | 57.36*      | -15.15         | 56.23*  |
| ln(income)      | -6.21   | -10.04     | 10.27    | 32.03    | 1.14   | -2.48       | 13.00          | 2.16    |
| household size  | -11.55  | -34.03*    | -21.65   | -24.79   | -3.97  | -19.13      | -10.54         | -12.53  |
| old_share       | 29.00   | 34.08      | -41.52   | -119.52* | -40.97 | -139.83*    | -67.34*        | -35.15  |
| children_share  | 113.67  | 73.17      | 133.66   | 250.89   | -90.61 | -107.67     | 78.55          | -47.89  |
| Age             | -0.22   | -0.63      | 2.05     | 5.59*    | 0.15   | 3.08        | 1.55           | 1.67    |
| Gender(male)    | 24.62   | -23.77     | -228.79* | -107.30* | -13.20 | -34.74      | -35.31         | -17.85  |
| Marital status  | -30.31  | 51.64      | -10.42   | 87.02    | 4.97   | 83.79*      | 7.33           | -36.99  |
| Education       | 2.20    | -4.28      | 4.78     | 5.57     | 1.19   | -1.62       | 0.56           | 0.52    |
| Village Control | Yes     | Yes        | Yes      | Yes      | Yes    | Yes         | Yes            | Yes     |
| Constant        | 332.48* | 424.04*    | 99.45    | -283.25* | 61.01  | -41.01      | 0.50           | -47.93  |
| Observations    | 157     | 157        | 157      | 157      | 157    | 157         | 157            | 157     |
| R <sup>2</sup>  | 0.22    | 0.33       | 0.25     | 0.25     | 0.17   | 0.36        | 0.18           | 0.19    |
| Mean of Y       | 323.20  | 307.60     | 81.50    | 98.01    | 57.82  | 66.40       | 61.53          | 63.76   |

Note: Results were estimated using OLS model and using data collected from 2019 to 2021. Characteristics of household (income, household size, share of children and old people in the household, diversity of agricultural production) and household head (age, gender, marital status, education), and village dummies had been adjusted in the regression. Non-farmers referred to rural households who did not produce any foods. \* refers to statistically significant at 5%.

**Table S15 Impact of COVID-19 on dietary diversity and CFPS**

| Variable             | Short-run         |         |       | Long-run          |         |       |
|----------------------|-------------------|---------|-------|-------------------|---------|-------|
|                      | dietary diversity |         | CFPS  | dietary diversity |         | CFPS  |
|                      | OLS               | Poisson | OLS   | OLS               | Poisson | OLS   |
| COVID-19             | -0.63*            | -0.63*  | 0.23* | -0.70*            | -0.68*  | 0.17  |
| ln(income)           | 0.13              | 0.13    | 0.05  | 0.18*             | 0.17*   | 0.06  |
| household size       | -0.09             | -0.09   | -0.08 | -0.04             | -0.03   | -0.03 |
| old_share            | -0.37             | -0.37   | -0.19 | -0.33             | -0.33   | -0.05 |
| children_share       | -0.02             | -0.01   | -0.07 | -0.52             | -0.51   | -0.48 |
| production diversity | -0.01             | -0.01   | -0.02 | 0.03              | 0.03    | 0.00  |
| Age                  | 0.02              | 0.02    | 0.01* | 0.01              | 0.01    | 0.01  |
| Gender(male)         | -0.30             | -0.28   | -0.23 | -0.04             | -0.03   | -0.13 |
| Marital status       | -0.17             | -0.17   | 0.43  | -0.15             | -0.16   | 0.18  |
| Education            | 0.05              | 0.05    | 0.01  | 0.06*             | 0.06*   | 0.02  |
| Village Control      | Yes               | Yes     | Yes   | Yes               | Yes     | Yes   |
| Constant             | 4.54*             | ---     | 1.11* | 4.21*             | ---     | 1.21* |
| Observations         | 418               | 418     | 418   | 626               | 626     | 626   |
| R <sup>2</sup>       | 0.16              | ---     | 0.18  | 0.15              | ---     | 0.11  |
| Mean of Y            | 5.42              | ---     | 2.25  | 5.232             | ---     | 2.232 |

Note: Results were estimated using OLS model and Poisson model. Short-run impact was estimated using data collected in 2019 and 2020, and long-run impact was tested using data collected from 2019 to 2021. Dietary diversity was the number of food items consumed by each household. CFPS was the Chinese Food Pagoda Score. Characteristics of household (income, household size, share of children and old people in the household, diversity of agricultural production) and household head (age, gender, marital status, education), and village dummies had been adjusted in the regression. \* refers to statistically significant at 5%.

**Table S16 Short-run impact of COVID-19 on dietary diversity and CFPS for farmers and non-farmers**

| Variable             | Farmers           |         |         | Non-farmers       |         |       |
|----------------------|-------------------|---------|---------|-------------------|---------|-------|
|                      | dietary diversity |         | CFPS    | dietary diversity |         | CFPS  |
|                      | OLS               | Poisson | OLS     | OLS               | Poisson | OLS   |
| COVID-19             | -0.56***          | -0.57*  | 0.30**  | -0.58             | -0.54   | 0.41  |
| ln(income)           | 0.01              | 0.02    | -0.04   | 0.31              | 0.31    | 0.14  |
| household size       | -0.13             | -0.14   | -0.10*  | -0.01             | -0.01   | -0.10 |
| old_share            | -0.35             | -0.34   | -0.35   | -0.43             | -0.43   | -0.50 |
| children_share       | 0.07              | 0.13    | -0.36   | 0.04              | 0.01    | 0.76  |
| production diversity | -0.05             | -0.05   | -0.09** | ---               | ---     | ---   |
| Age                  | 0.02              | 0.02    | 0.02**  | 0.02              | 0.02    | 0.02  |
| Gender(male)         | -0.04             | -0.02   | -0.21   | -1.33**           | -1.35*  | -0.43 |
| Marital status       | -0.23             | -0.21   | 0.45    | -0.10             | -0.10   | 0.30  |
| Education            | 0.03              | 0.03    | 0.00    | 0.11*             | 0.11*   | 0.03  |
| Village Control      | Yes               | Yes     | Yes     | Yes               | Yes     | Yes   |
| Constant             | 4.88***           | ---     | 1.40**  | 4.45***           | ---     | 0.74  |
| Observations         | 289               | 289     | 289     | 129               | 129     | 129   |
| R <sup>2</sup>       | 0.17              | ---     | 0.26    | 0.24              | ---     | 0.27  |
| Mean of Y            | 5.42              | ---     | 2.25    | 5.42              | ---     | 2.25  |

Note: Results were estimated using OLS model and Poisson model. Short-run impact was estimated using data collected in 2019 and 2020. Dietary diversity was the number of food items consumed by each household. CFPS was the Chinese Food Pagoda Score. Characteristics of household (income, household size, share of children and old people in the household, diversity of agricultural production) and household head (age, gender, marital status, education), and village dummies had been adjusted in the regression. Farmers referred to rural households who were still engaged in agricultural production, and non-farmers was the sample only includes rural households who did not produce any foods. \* refers to statistically significant at 5%.



**Table S17 Long-run impact of COVID-19 on dietary diversity and CFPS for farmers and non-farmers**

| Variable             | Farmers           |         |       | Non-farmers       |         |        |
|----------------------|-------------------|---------|-------|-------------------|---------|--------|
|                      | dietary diversity |         | CFPS  | dietary diversity |         | CFPS   |
|                      | OLS               | Poisson | OLS   | OLS               | Poisson | OLS    |
| COVID-19             | -0.75*            | -0.75*  | 0.17  | -0.63             | -0.59   | 0.31   |
| ln(income)           | 0.18*             | 0.17*   | 0.04  | 0.18              | 0.18    | 0.04   |
| household size       | -0.04             | -0.04   | -0.03 | -0.04             | -0.03   | -0.12  |
| old_share            | -0.02             | -0.02   | 0.07  | -1.16*            | -1.17*  | -0.72* |
| children_share       | -0.44             | -0.45   | -0.65 | 0.07              | 0.07    | 0.76   |
| production diversity | 0.05              | 0.05    | -0.01 | ---               | ---     | ---    |
| Age                  | 0.01              | 0.01    | 0.01  | 0.03              | 0.03*   | 0.02   |
| Gender(male)         | 0.10              | 0.12    | -0.06 | -1.03             | -1.07*  | -0.46  |
| Marital status       | -0.24             | -0.24   | 0.06  | 0.04              | 0.02    | 0.50   |
| Education            | 0.05*             | 0.05*   | 0.02  | 0.07              | 0.07    | -0.00  |
| Village Control      | Yes               | Yes     | Yes   | Yes               | Yes     | Yes    |
| Constant             | 4.39*             | ---     | 1.43* | 3.84*             | ---     | 1.05   |
| Observations         | 469               | 469     | 469   | 157               | 157     | 157    |
| R <sup>2</sup>       | 0.16              | ---     | 0.15  | 0.24              | ---     | 0.20   |
| Mean of Y            | 5.23              | ---     | 2.23  | 5.23              | ---     | 2.23   |

Note: Results were estimated using OLS model and Poisson model. Long-run impact was estimated using data collected from 2019 to 2021. Dietary diversity was the number of food items consumed by each household. CFPS was the Chinese Food Pagoda Score. Characteristics of household (income, household size, share of children and old people in the household, diversity of agricultural production) and household head (age, gender, marital status, education), and village dummies had been adjusted in the regression. Farmers referred to rural households who were still engaged in agricultural production, and non-farmers was the sample only includes rural households who did not produce any foods. \* refers to statistically significant at 5%.
